# Supplementary material for: Fluorescence sensing of ADP over ATP and PPi in 100% aqueous solution
Source: Royal Society of Chemistry journal article supplement (doi:10.1039/c5an01291k), 2015-01-01
Supplement: c5an01291k1.pdf [file c5an01291k1.pdf]

## Electronic Supplementary Information (ESI)

### **Fluorescence sensing ADP over ATP and PPI in 100% aqueous solution**

Feihu Huang, Gefei Hao, Fengxu Wu, Guoqiang Feng\*

*Key Laboratory of Pesticide and Chemical Biology of Ministry of Education, College of Chemistry,  
Central China Normal University, Wuhan 430079, P.R. China,  
[gf256@mail.ccnu.edu.cn](mailto:gf256@mail.ccnu.edu.cn)*

#### **Table of contents:**

|                                                 |          |
|-------------------------------------------------|----------|
| <b>1. General Experimentals</b> .....           | Page S2  |
| <b>2. Synthesis of ZnL</b> .....                | Page S3  |
| <b>3. Additional Spectra and Data</b> .....     | Page S9  |
| <b>4. Quantum Mechanical Calculations</b> ..... | Page S17 |

## 1. General Experimentals.

Starting materials were purchased from commercial suppliers and were used without further purification. 9,10-bisaminomethylanthracene (**2**) and 2-Bromomethyl-6-pivalamidopyridine (**3**) were prepared according the previously published methods (see below). All solvents were purified by the most used methods before use. Distilled water was used after passing through a Millipore-Q ultrapurification system. NMR spectra were measured on Varian Mercury 400 and 600 instruments. HR-MS data were obtained with an LC/Q-TOF MS spectrometer. UV-vis spectra and fluorescent spectra were recorded on an Agilent Cary 100 UV-vis spectrophotometer and an Agilent Cary Eclipse fluorescence spectrophotometer, respectively. Both UV-vis and fluorescence spectrophotometer are equipped with a temperature controller. Standard quartz cuvettes with a 10 mm lightpath are used for all UV-vis spectra and fluorescent spectra measurements. Cell imaging was performed in an inverted fluorescence microscopy with a 20× objective lens.

**Fluorescent Studies of ZnL upon Addition of Analytes.** For a typical optical measurements, 3.0 mL of **ZnL** (5  $\mu$ M) in a HEPES buffer (10 mM, pH 7.2) was placed in a quartz cell at 25 °C. The fluorescent spectra were then recorded immediately after addition of analytes.

The fluorescence quantum yields of **ZnL**, **ZnL-2ADP** and **ZnL-2ATP** were determined to be  $\Phi = 0.02$ , 0.99, and 0.50 in HEPES buffer (10 mM, pH 7.2) at 25°C, using quinine sulfate ( $\Phi_f = 0.58$  in 1N H<sub>2</sub>SO<sub>4</sub>) as standard.

**Cell Culture and Imaging.** HeLa cells were cultured in Dulbecco's Modified Eagle's Medium (DMEM) supplemented with 10% FBS (fetal bovine serum), 100 mg/mL penicillin and 100  $\mu$ g/mL streptomycin in a 5% CO<sub>2</sub>, water saturated incubator at 37 °C. Before cell imaging experiments, HeLa cells were seeded in 12-well culture plate for one night. For living cell imaging experiments, cells were incubated with 25  $\mu$ M of **ZnL** for 30 min at 37 °C and washed three times with prewarmed PBS buffer, and then imaged immediately. For apyrase treated experiments, HeLa cells were pretreated with 5 units apyrase for 30 min at 37 °C,

washed three times with prewarmed PBS buffer, and then incubated with 25  $\mu\text{M}$  of **ZnL** (or incubated with 125  $\mu\text{M}$  of ADP for 30 min prior to addition of probe **1** for a control experiment) for 30 min at 37  $^{\circ}\text{C}$ . Cell imaging was then carried out after washing cells with prewarmed PBS buffer.

## 2. Synthesis of ZnL

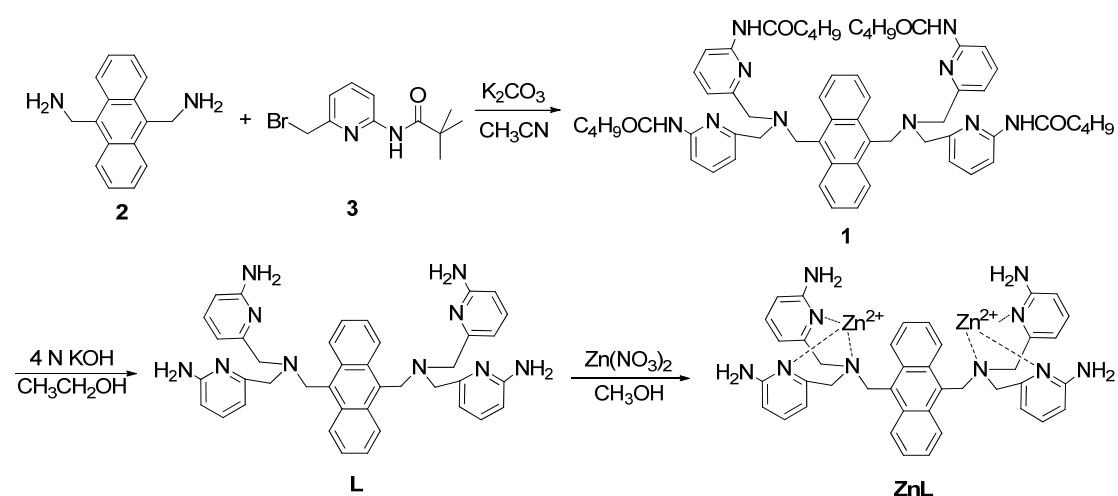

**Synthesis of 1:** To a solution of **2**<sup>s1</sup> (236 mg, 1.00 mmol) and **3**<sup>s2</sup> (1.14 g, 4.2 mmol) in anhydrous  $\text{CH}_3\text{CN}$  (30 mL) was added  $\text{K}_2\text{CO}_3$  (621 mg, 4.50 mmol). The reaction mixture was then heated to reflux for 12 hours, and the solvent was evaporated under reduced pressure. To the residue was added dichloromethane (60 mL), and the organic phase was washed with water and brine followed by drying over  $\text{Na}_2\text{SO}_4$ . After removal of the solvent under reduced pressure, the crude product was purified by silica gel column (eluent: dichloromethane /methanol = 50:1 (v/v)) to give a yellow powder (800 mg, 80% yield). Mp 116-118  $^{\circ}\text{C}$ .  $^1\text{H}$  NMR (400 MHz,  $\text{CDCl}_3$ )  $\delta$  8.41-8.39 (dd,  $J = 6.8, 3.2$  Hz, 4H), 8.08 (s, 4H), 8.01 (d,  $J = 8.0$  Hz, 4H), 7.50 (t,  $J = 8.0$  Hz, 4H), 7.43 (dd,  $J = 6.8, 3.2$  Hz, 4H), 6.98 (d,  $J = 7.6$  Hz, 4H), 4.57 (s, 4H), 3.74 (s, 8H), 1.31 (s, 36H).  $^{13}\text{C}$  NMR (100 MHz,  $\text{CDCl}_3$ ):  $\delta$  176.99, 157.59, 150.57, 138.35, 130.97, 130.31, 125.51, 124.83, 119.07, 111.82, 60.36, 51.16, 39.70, 27.42. IR (KBr)  $\nu_{\text{max}}$  ( $\text{cm}^{-1}$ ): 3437, 2964, 1688, 1578, 1518, 1453, 1306, 1152. HR-MS Calc. for  $\text{C}_{60}\text{H}_{73}\text{N}_{10}\text{O}_4^+$  ( $\text{M} + \text{H}^+$ ) 997.5811, found 997.5791.

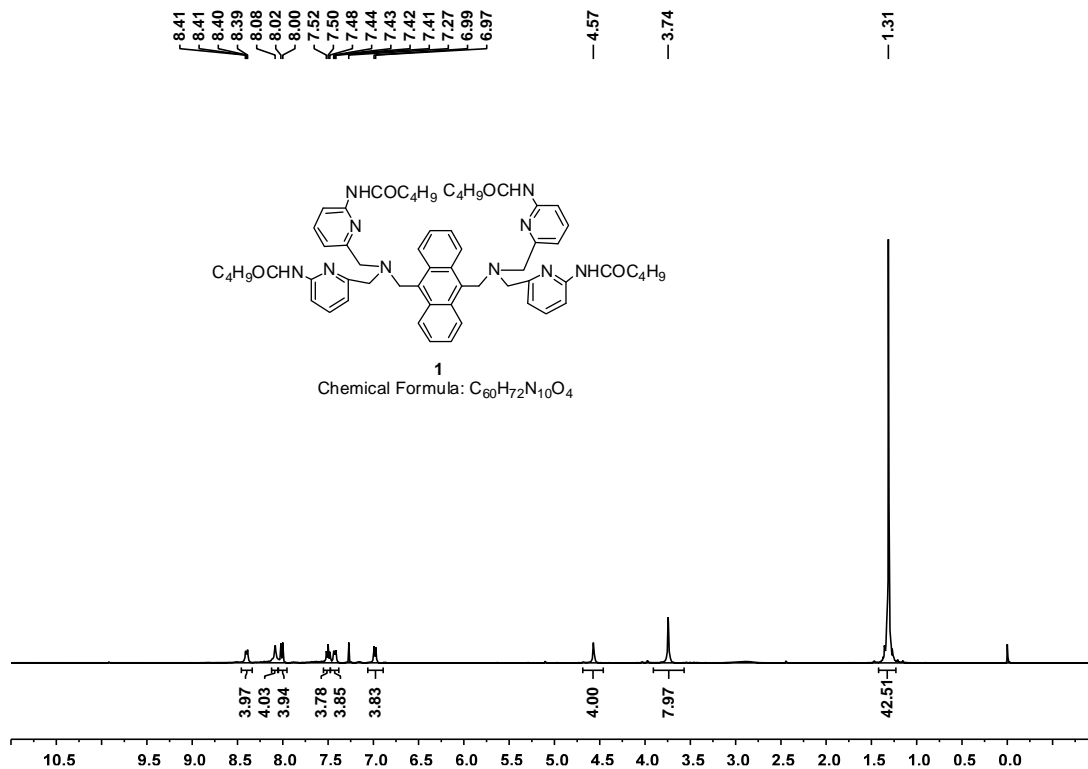

$^1\text{H}$  NMR spectrum of **1** in  $\text{CDCl}_3$ .

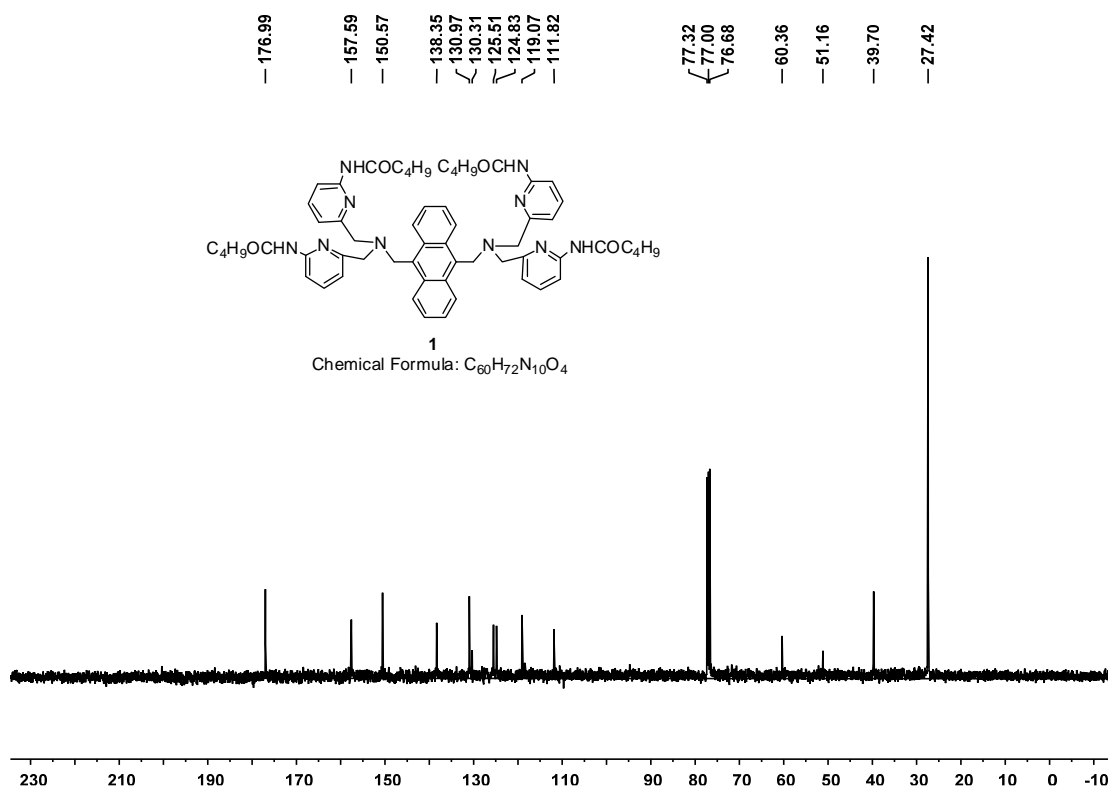

$^{13}\text{C}$  NMR spectrum of **1** in  $\text{CDCl}_3$ .

10-4\_140507210122 #350 RT: 5.59 AV: 1 NL: 1.64E7  
T: FTMS + p ESI Full ms [50.00-2000.00]

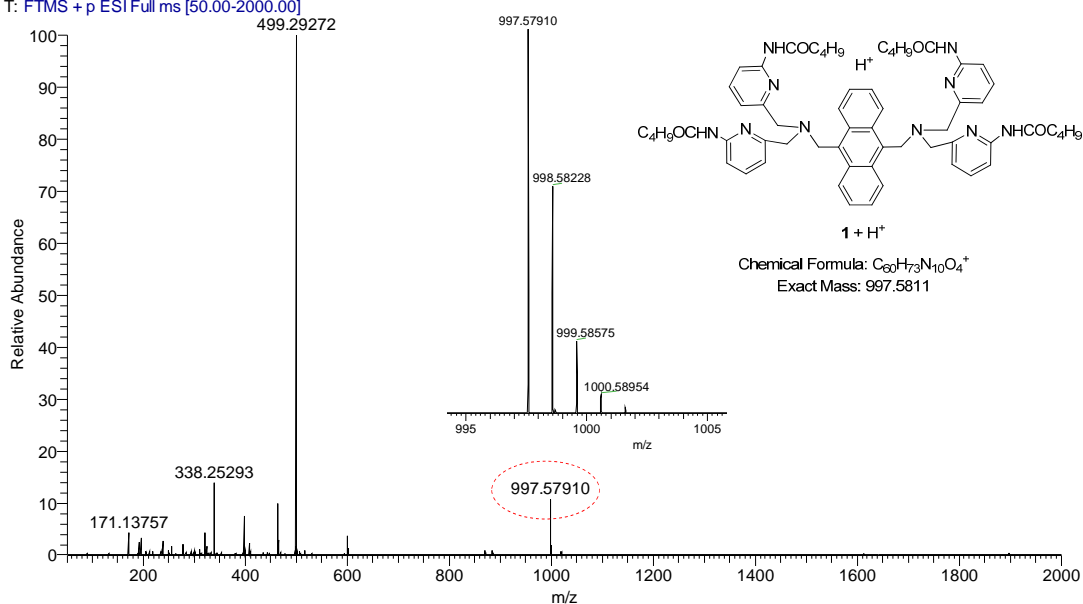

HR-MS spectrum of **1**

**Synthesis of L:** To 600 mg of **1** was added 50 ml of 4 M KOH and  $CH_3CH_2OH$  50 mL. The mixture was heated to reflux for 16 hours, and the  $CH_3CH_2OH$  was evaporated under reduced pressure. The aqueous solution was then extracted with ethyl acetate ( $4 \times 30$  mL), dried over  $Na_2SO_4$ , and concentrated in vacuo to yield a brown yellow solid, 330 mg (83%). Mp 254-256°C.  $^1H$  NMR (400 MHz,  $DMSO-d_6$ )  $\delta$  8.52 (s, 4H), 7.48 (s, 4H), 7.30-7.31 (d,  $J = 4.0$  Hz, 4H), 6.54-6.56 (d,  $J = 8.0$  Hz, 4H), 6.26-6.28 (d,  $J = 8.0$  Hz, 4H), 5.82 (s, 8H), 4.52 (s, 4H), 3.52 (s, 8H).  $^{13}C$  NMR (100 MHz,  $DMSO-d_6$ )  $\delta$  159.14, 157.40, 137.33, 130.73, 125.72, 125.16, 110.61, 106.05, 59.75, 50.09. IR (KBr)  $\nu_{max}$  ( $cm^{-1}$ ): 3446, 3360, 3223, 2929, 1639, 1572, 1484, 1384, 1293, 1170, 1011, 833, 803, 764, 710; ESI-MS: m/z found 661.4 ( $M + H^+$ ); HR-MS Calc. for  $C_{40}H_{41}N_{10}^+$  ( $M + H^+$ ) 661.351, found 661.351. Elemental analysis calcd for  $C_{40}H_{40}N_{10}$ : C 72.70, H 6.10, N 21.20; found: C 72.71, H 6.037, N 21.15.

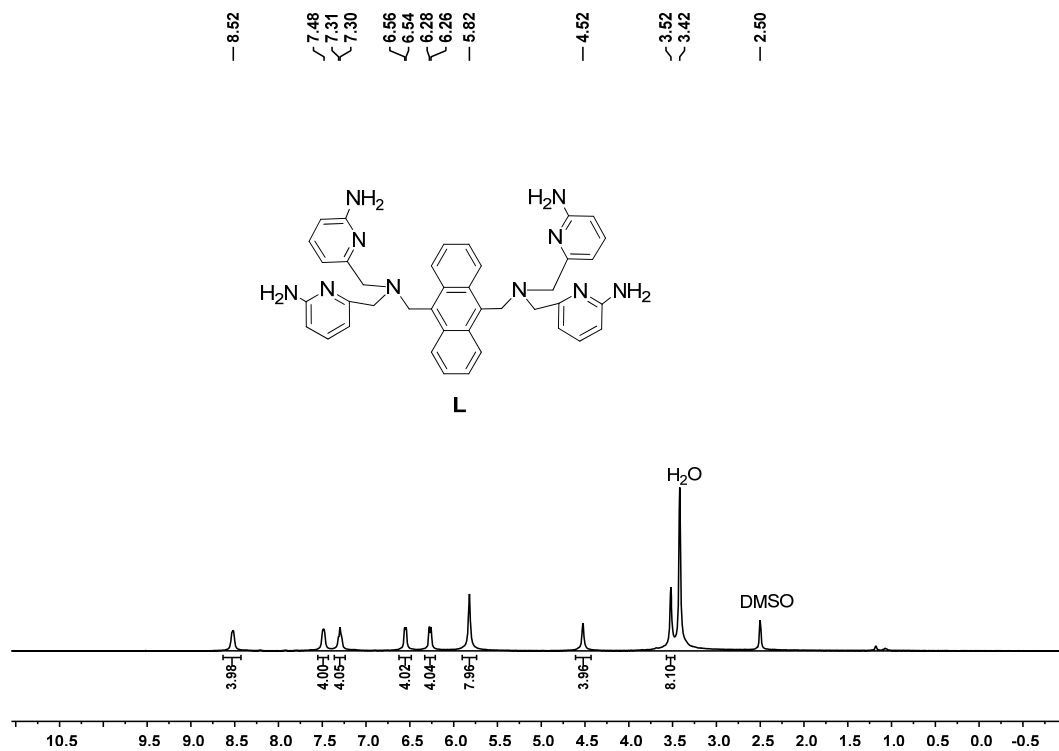

$^1\text{H}$  NMR spectrum of **L** in  $\text{DMSO-}d_6$ .

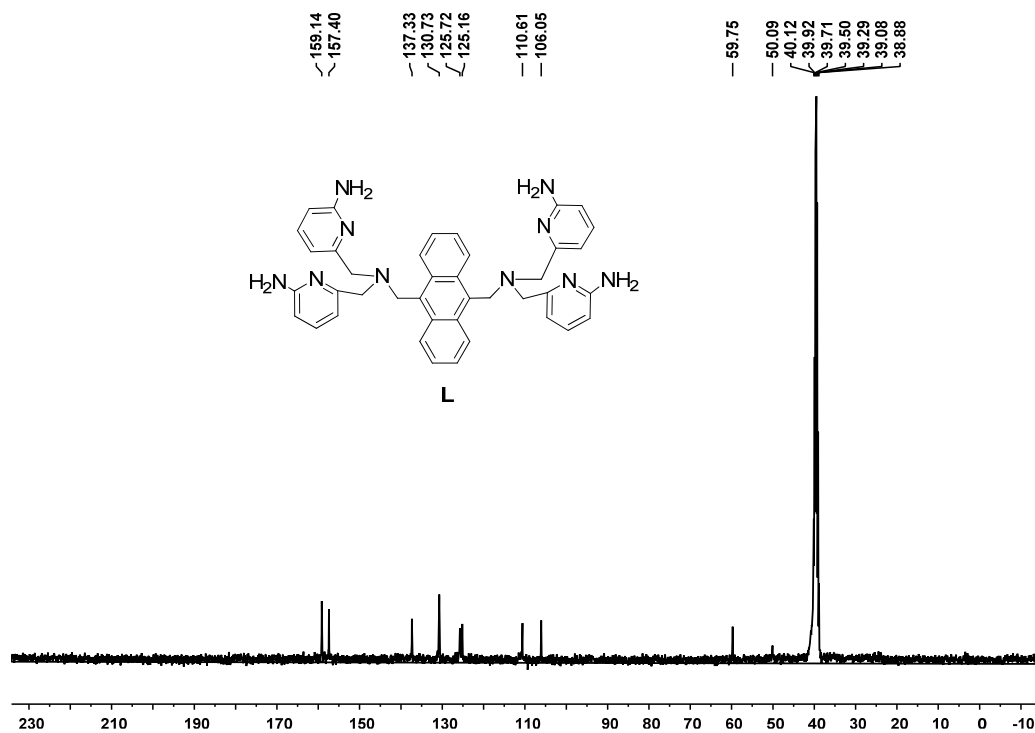

$^{13}\text{C}$  NMR spectrum of **L** in  $\text{DMSO-}d_6$ .

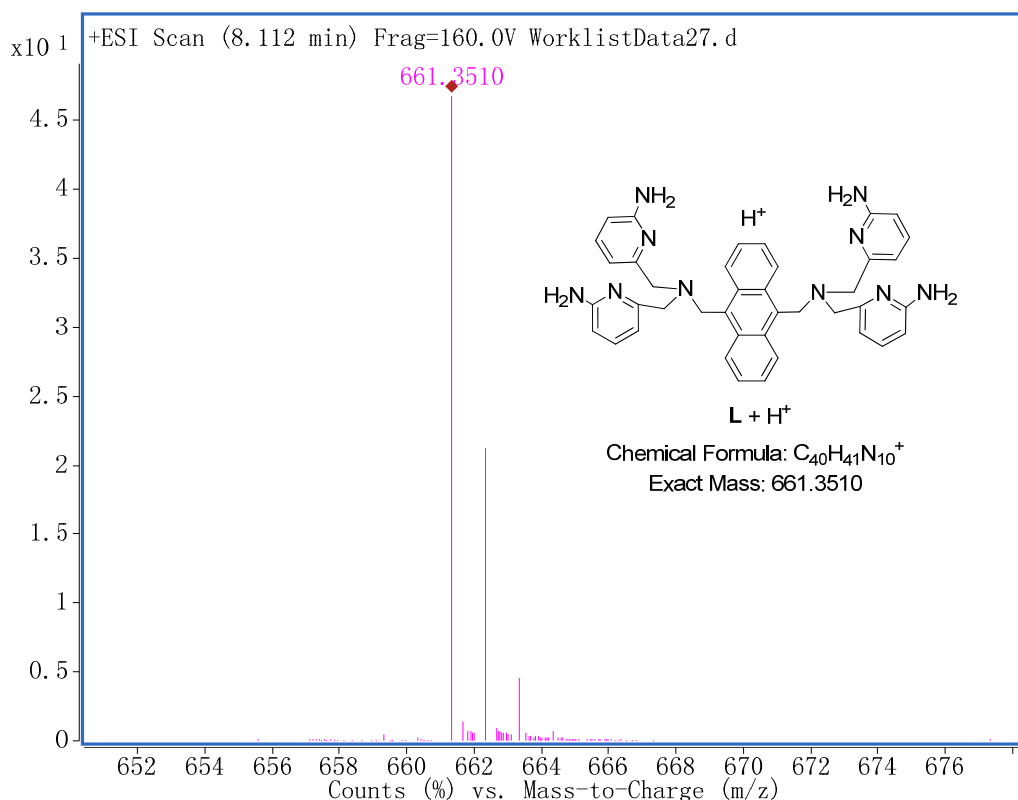

HR-MS spectrum of **L**

**Synthesis of ZnL:** To a solution of **L** (33 mg, 0.05 mmol) in 5 mL of MeOH, was added  $Zn(NO_3)_2 \cdot 6H_2O$  (33 mg, 0.11 mmol), and the mixture was stirred for 1 h at rt. After concentrating under reduced pressure, the obtained solid was recrystallized from MeOH to afford **ZnL** (41 mg, 81%). Mp  $>300$  °C.  $^1H$  NMR (400 MHz, DMSO): 8.08(s, 4H), 7.61(s, 4H), 7.54 (s, 4H), 6.93 (s, 8H), 6.72 (d,  $J = 7.8$  Hz, 4H), 6.28 (s, 4H), 4.93 (s, 4H), 3.51-3.26 (m, 8H).  $^{13}C$  NMR (100 MHz, DMSO)  $\delta$  169.58, 161.69, 150.68, 142.06, 141.77, 136.35, 135.71, 122.00, 120.91, 66.88, 61.71. IR (KBr)  $\nu_{max}$  ( $cm^{-1}$ ): 3446, 3360, 1639, 1572, 1484, 1384, 1293, 1170, 1011, 833, 803, 764. HR-MS Calc. for  $C_{40}H_{40}N_{13}O_9Zn_2^+ [M-NO_3]^-$  974.1649, found 974.1953. Elemental analysis calcd for  $C_{40}H_{40}N_{10}Zn_2(NO_3)_4 \cdot H_2O$ : C 45.43, H 4.00, N 18.54; found: C 45.52, H 3.91, N 18.75.

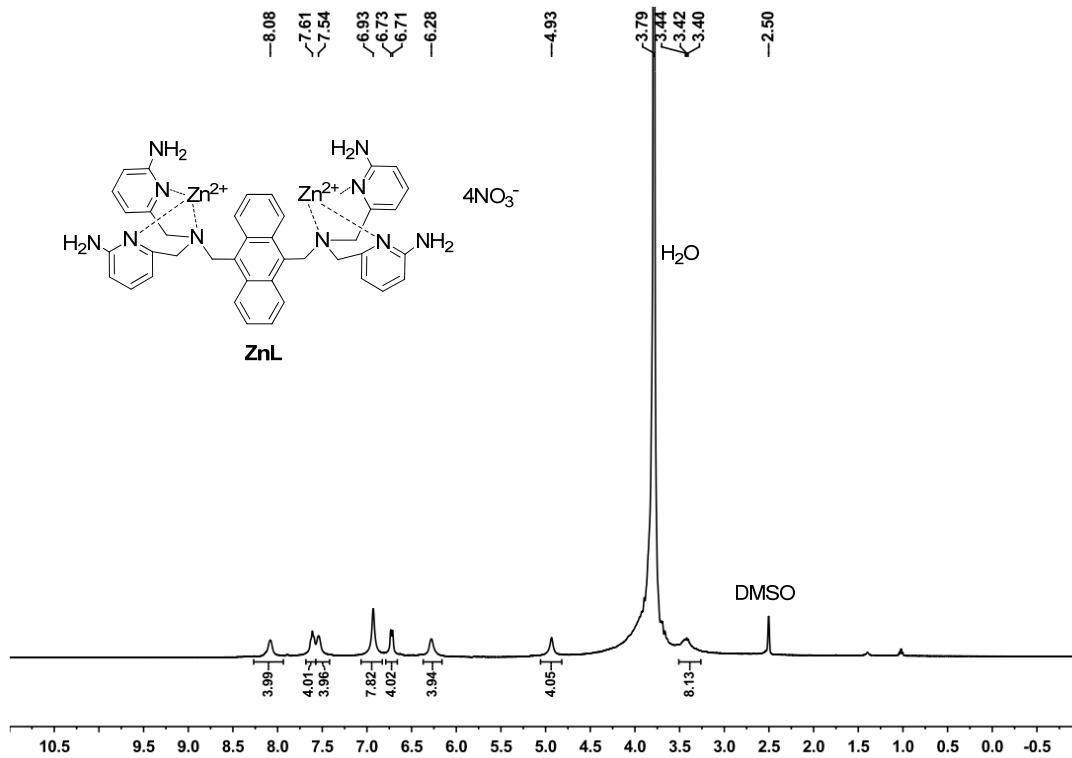

$^1\text{H}$  NMR spectrum of **ZnL** in  $\text{DMSO-}d_6$ .

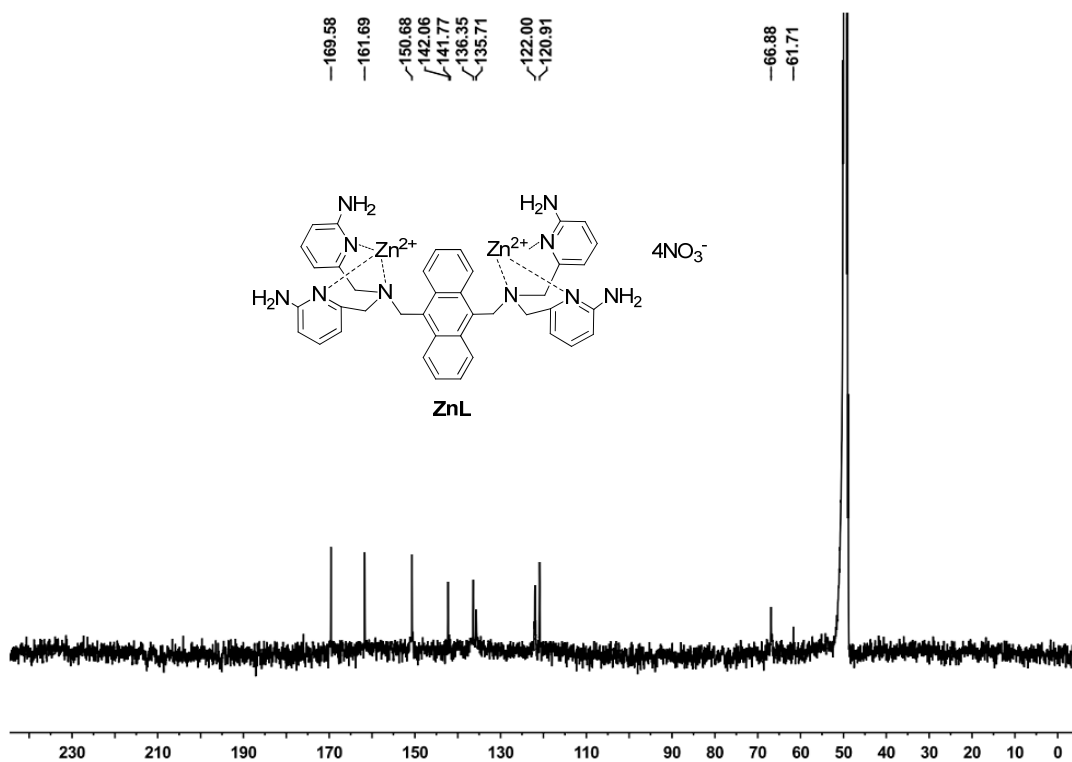

$^{13}\text{C}$  NMR spectrum of **ZnL** in  $\text{DMSO-}d_6$ .



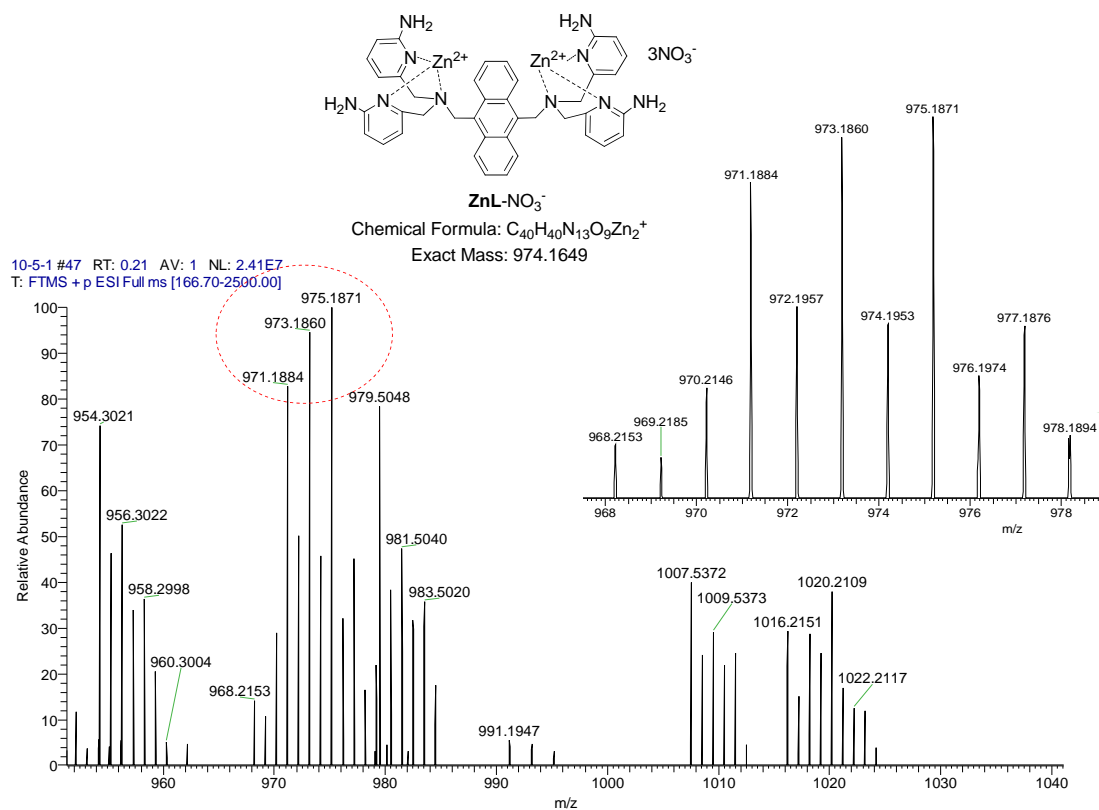

HR-MS spectrum of **ZnL**

(S1) Gassensmith, J. J.; Arunkumar, E.; Barr, L.; Baumes, J. M.; DiVittorio, K. M.; Johnson, J. R.; Noll, B. C.; Smith, B. D. *J. Am. Chem. Soc.* **2007**, *129*, 15054–15059.

(S2) Livieri, M.; Mancin, F.; Tonellato, U.; Chin, J.; Cowley, A. *Chem. Commun.* **2008**, 392–394.

### 3. Additional Spectra and Data

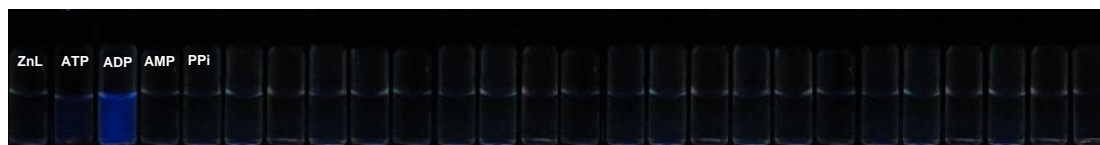

**Figure S1.** Fluorescence colour (under 365 nm light) changes of **ZnL** (5  $\mu$ M) in 10 mM aqueous HEPES buffer solution (pH = 7.2) with 50  $\mu$ M of different anions (from left to right: none, ATP, ADP, AMP, PPi, Citrate, PO<sub>4</sub><sup>3-</sup>, HPO<sub>4</sub><sup>2-</sup>, H<sub>2</sub>PO<sub>4</sub><sup>-</sup>, F<sup>-</sup>, Cl<sup>-</sup>, Br<sup>-</sup>, I<sup>-</sup>, ClO<sub>4</sub><sup>-</sup>, CO<sub>3</sub><sup>2-</sup>, HCO<sub>3</sub><sup>-</sup>, NO<sub>3</sub><sup>-</sup>, NO<sub>2</sub><sup>-</sup>, AcO<sup>-</sup>, N<sub>3</sub><sup>-</sup>, SO<sub>4</sub><sup>2-</sup>, HSO<sub>4</sub><sup>-</sup>, SCN<sup>-</sup>, S<sub>2</sub>O<sub>7</sub><sup>2-</sup>, S<sup>2-</sup>, S<sub>2</sub>O<sub>3</sub><sup>2-</sup>).

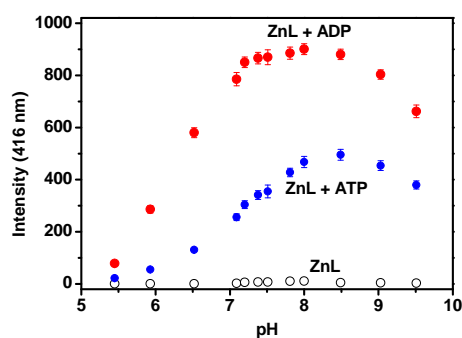

**Figure S2.** The effect of pH on the fluorescence intensity changes of **ZnL** ( $5 \mu\text{M}$ ) in the absence and in the presence of ATP ( $50 \mu\text{M}$ ) or ADP ( $50 \mu\text{M}$ ) at  $25^\circ\text{C}$ .  $\lambda_{\text{ex}} = 380 \text{ nm}$ ,  $d_{\text{em}} = d_{\text{ex}} = 5 \text{ nm}$ .

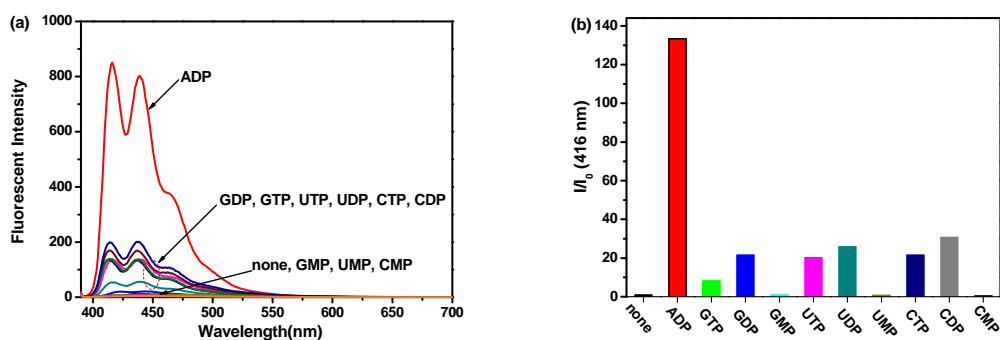

**Figure S3.** Left: Fluorescence emission spectra of **ZnL** ( $5 \mu\text{M}$ ) in the presence of various nucleotides ( $50 \mu\text{M}$ ); Right: A plot of the relative fluorescent intensity ( $I/I_0$ ) of **ZnL** ( $5 \mu\text{M}$ ) at  $416 \text{ nm}$  against  $50 \mu\text{M}$  of different nucleotides (from left to right: none, ADP, GTP, GDP, GMP, UTP, UDP, UMP, CTP, CDP, CMP).  $\lambda_{\text{ex}} = 380 \text{ nm}$ ,  $d_{\text{em}} = d_{\text{ex}} = 5 \text{ nm}$ .

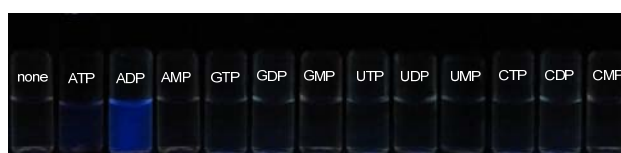

**Figure S4.** Fluorescence colour (under a  $365 \text{ nm}$  light) changes of **ZnL** ( $5 \mu\text{M}$ ) in  $10 \text{ mM}$  aqueous HEPES buffer solution ( $\text{pH} = 7.2$ ) with  $50 \mu\text{M}$  of different anions (from left to right: none, ATP, ADP, AMP, GTP, GDP, GMP, UTP, UDP, UMP, CTP, CDP, CMP).

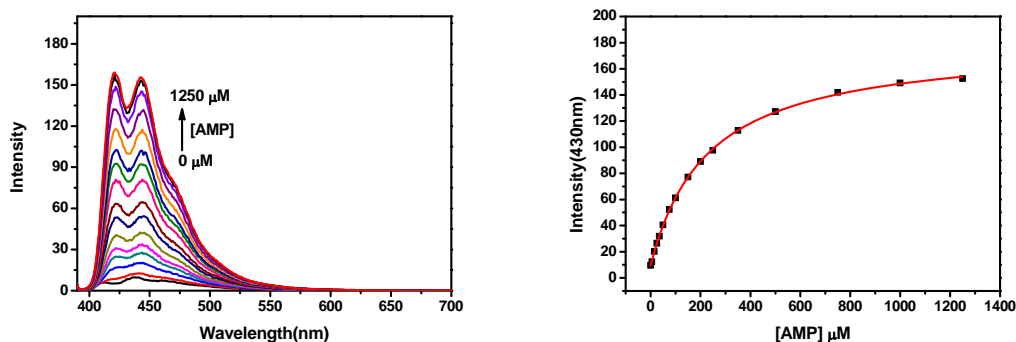

**Figure S5.** Left: Fluorescent titration of complex **ZnL** (5  $\mu\text{M}$ ) upon the addition of AMP (0-1250  $\mu\text{M}$ ) in HEPES buffer (10 mM, pH = 7.2) solution at 25°C; Right: The saturation curve of fluorescent intensity changes at 430 nm.  $\lambda_{\text{ex}} = 380$  nm,  $d_{\text{em}} = d_{\text{ex}} = 5$  nm.

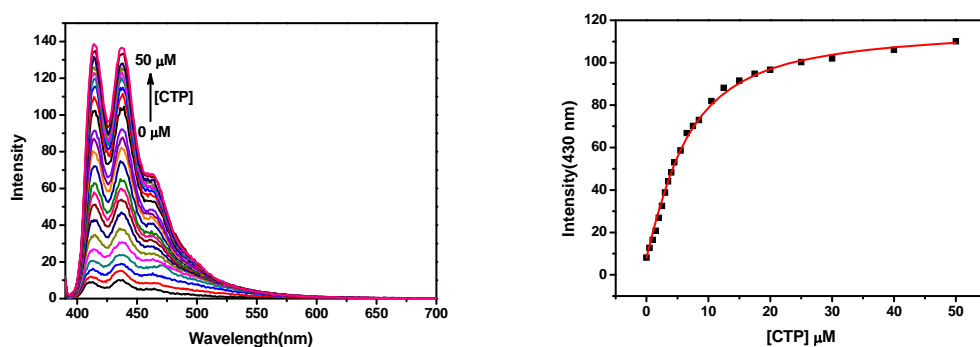

**Figure S6.** Left: Fluorescent titration of complex **ZnL** (5  $\mu\text{M}$ ) upon the addition of CTP (0-50  $\mu\text{M}$ ) in HEPES buffer (10 mM, pH = 7.2) solution at 25°C; Right: The saturation curve of fluorescent intensity changes at 430 nm.  $\lambda_{\text{ex}} = 380$  nm,  $d_{\text{em}} = d_{\text{ex}} = 5$  nm.

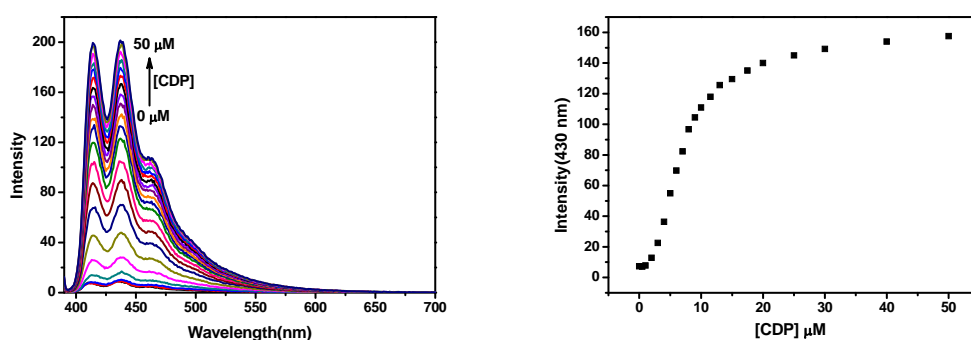

**Figure S7.** Left: Fluorescent titration of complex **ZnL** (5  $\mu\text{M}$ ) upon the addition of CDP (0-50  $\mu\text{M}$ ) in pH = 7.2, 10 mM HEPES buffer solution at 25°C; Right: The saturation curve of fluorescent intensity changes at 430 nm.  $\lambda_{\text{ex}} = 380$  nm,  $d_{\text{em}} = d_{\text{ex}} = 5$  nm.

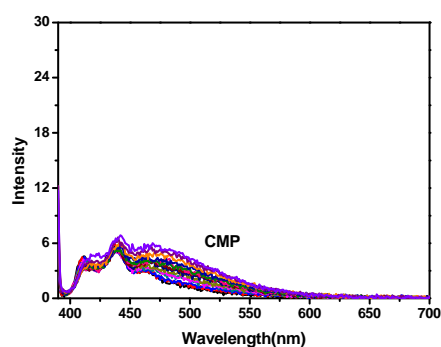

**Figure S8.** Fluorescent titration of complex **ZnL** ( $5 \mu\text{M}$ ) upon the addition of **CMP** ( $0\text{-}150 \mu\text{M}$ ) in HEPES buffer ( $10 \text{ mM}$ ,  $\text{pH} = 7.2$ ) solution at  $25^\circ\text{C}$ .  $\lambda_{\text{ex}} = 380 \text{ nm}$ ,  $d_{\text{em}} = d_{\text{ex}} = 5 \text{ nm}$ .

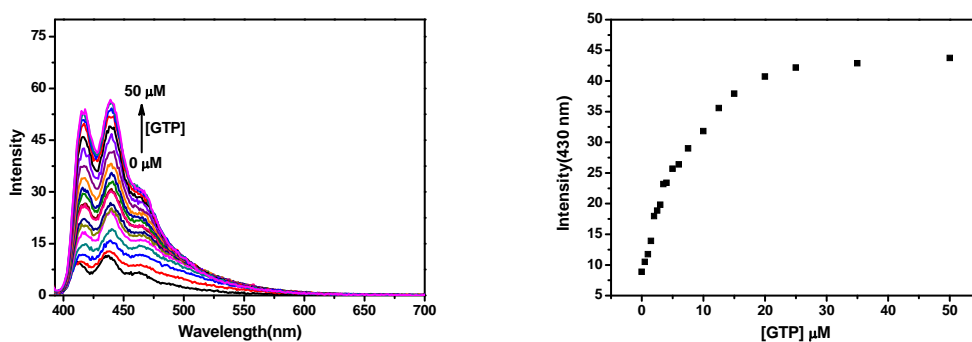

**Figure S9.** Left: Fluorescent titration of complex **ZnL** ( $5 \mu\text{M}$ ) upon the addition of **GTP** ( $0\text{-}50 \mu\text{M}$ ) in HEPES buffer ( $10 \text{ mM}$ ,  $\text{pH} = 7.2$ ) solution at  $25^\circ\text{C}$ ; Right: The saturation curve of fluorescent intensity changes at  $430 \text{ nm}$ .  $\lambda_{\text{ex}} = 380 \text{ nm}$ ,  $d_{\text{em}} = d_{\text{ex}} = 5 \text{ nm}$ .

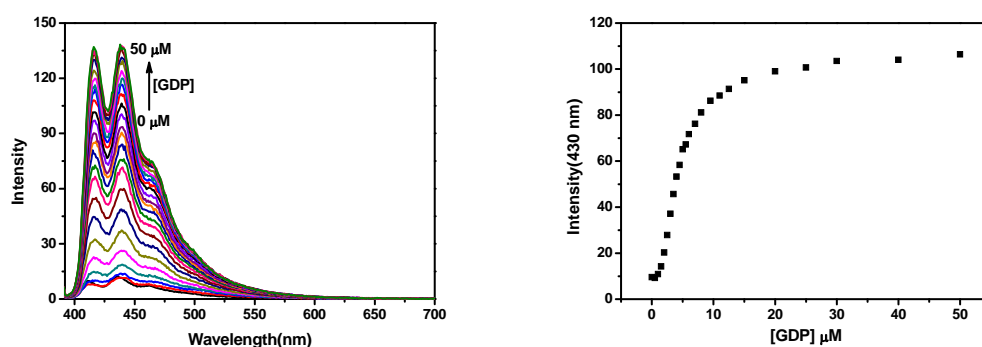

**Figure S10.** Left: Fluorescent titration of complex **ZnL** ( $5 \mu\text{M}$ ) upon the addition of **GDP** ( $0\text{-}50 \mu\text{M}$ ) in HEPES buffer ( $10 \text{ mM}$ ,  $\text{pH} = 7.2$ ) solution at  $25^\circ\text{C}$ ; Right: The saturation curve of fluorescent intensity changes at  $430 \text{ nm}$ .  $\lambda_{\text{ex}} = 380 \text{ nm}$ ,  $d_{\text{em}} = d_{\text{ex}} = 5 \text{ nm}$ .

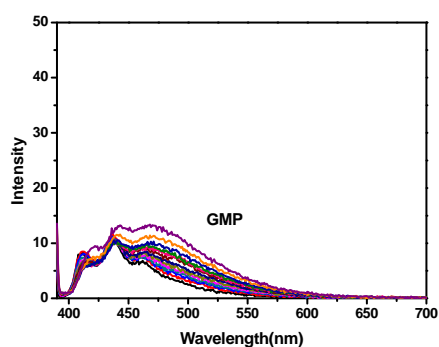

**Figure S11.** Fluorescent titration of complex **ZnL** (5  $\mu\text{M}$ ) upon the addition of GMP (0-250  $\mu\text{M}$ ) in HEPES buffer (10 mM, pH = 7.2) solution at 25°C.  $\lambda_{\text{ex}} = 380 \text{ nm}$ ,  $d_{\text{em}} = d_{\text{ex}} = 5 \text{ nm}$ .

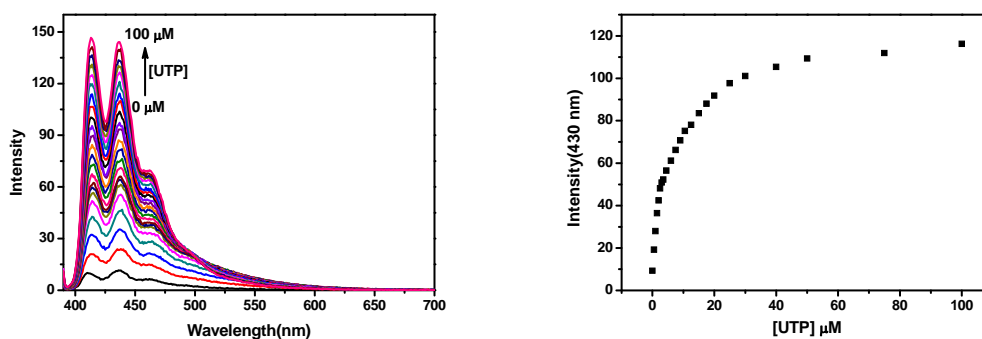

**Figure S12.** Left: Fluorescent titration of complex **ZnL** (5  $\mu\text{M}$ ) upon the addition of UTP (0-100  $\mu\text{M}$ ) in HEPES buffer (10 mM, pH = 7.2) solution at 25°C; Right: The saturation curve of fluorescent intensity changes at 430 nm.  $\lambda_{\text{ex}} = 380 \text{ nm}$ ,  $d_{\text{em}} = d_{\text{ex}} = 5 \text{ nm}$ .

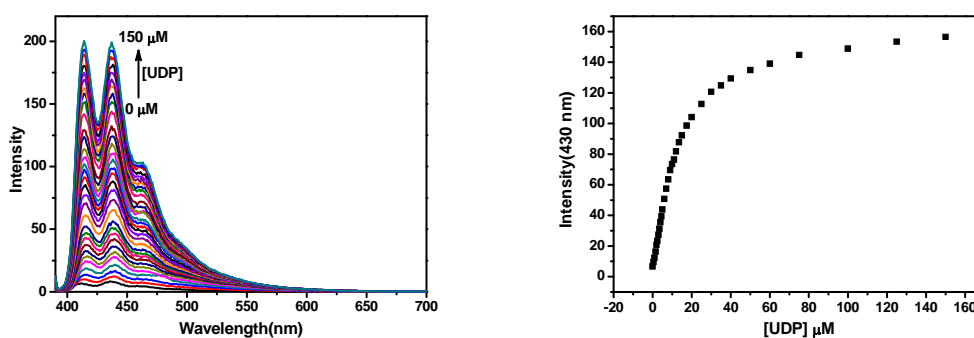

**Figure S13.** Left: Fluorescent titration of complex **ZnL** (5  $\mu\text{M}$ ) upon the addition of UDP (0-150  $\mu\text{M}$ ) in HEPES buffer (10 mM, pH = 7.2) solution at 25°C; Right: The saturation curve of fluorescent intensity changes at 430 nm.  $\lambda_{\text{ex}} = 380 \text{ nm}$ ,  $d_{\text{em}} = d_{\text{ex}} = 5 \text{ nm}$ .

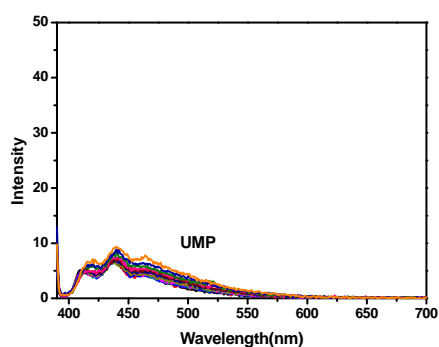

**Figure S14.** Fluorescent titration of complex **ZnL** (5  $\mu\text{M}$ ) upon the addition of UMP (0-250  $\mu\text{M}$ ) in HEPES buffer (10 mM, pH = 7.2) solution at 25°C.  $\lambda_{\text{ex}} = 380 \text{ nm}$ ,  $d_{\text{em}} = d_{\text{ex}} = 5 \text{ nm}$ .

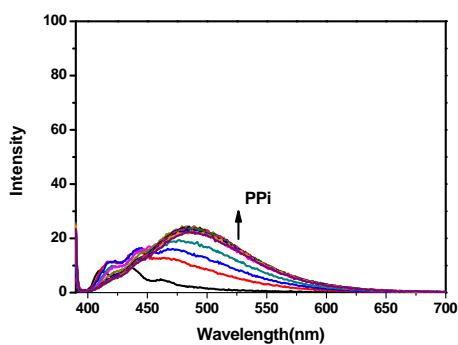

**Figure S15.** Fluorescent titration of complex **ZnL** (5  $\mu\text{M}$ ) upon the addition of PPI (0-25  $\mu\text{M}$ ) in HEPES buffer (10 mM, pH = 7.2) solution at 25°C.  $\lambda_{\text{ex}} = 380 \text{ nm}$ ,  $d_{\text{em}} = d_{\text{ex}} = 5 \text{ nm}$ . This data suggests that PPI induced an anthracene-excimer ( $\lambda_{\text{em}} \sim 480 \text{ nm}$ ) formation of the **ZnL** solution, which is similar to the result of our recent report (see: Huang, F.; Feng, G. *RSC Adv.* **2014**, *4*, 484–487.). However, the fluorescence enhancements induced by PPI are far less than that of ADP.

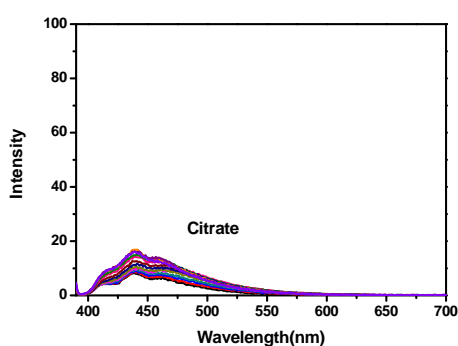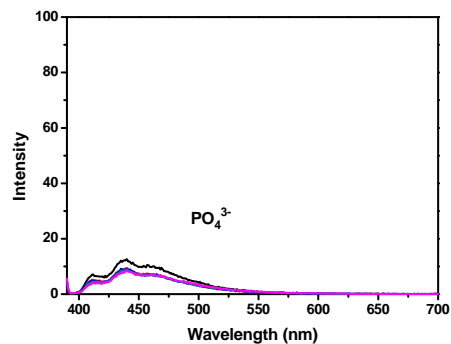

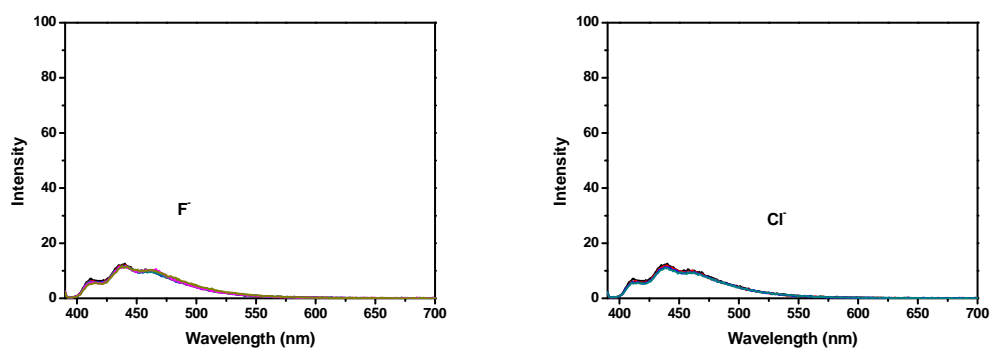

**Figure S16.** Fluorescent titration of complex **ZnL** (5  $\mu\text{M}$ ) upon the addition of citrate,  $\text{PO}_4^{3-}$ ,  $\text{F}^-$  and  $\text{Cl}^-$  (0-500  $\mu\text{M}$ ) as representative anionic analytes in HEPES buffer (10 mM, pH = 7.2) solution at 25°C.  $\lambda_{\text{ex}} = 380 \text{ nm}$ ,  $d_{\text{cm}} = d_{\text{ex}} = 5 \text{ nm}$ .

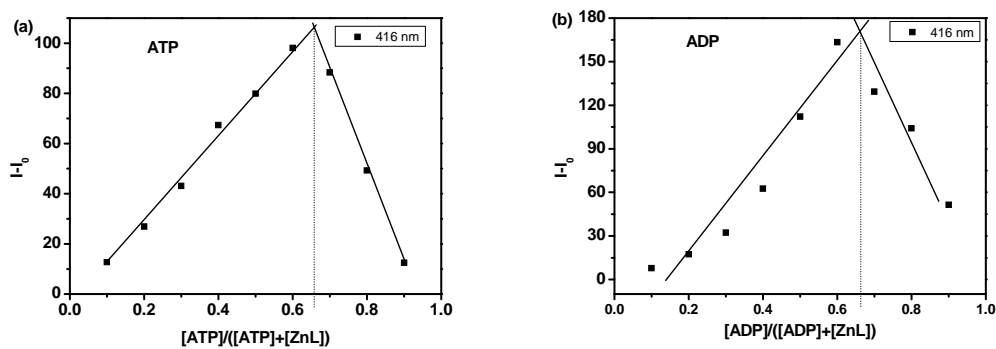

**Figure S17.** Job's plot examined between (a) **ZnL** and ATP and (b) **ZnL** and ADP in HEPES buffer (10 mM, pH = 7.2) solution at 25°C.  $[\text{ATP or ADP}] + [\text{ZnL}] = 5 \mu\text{M}$ ,  $\lambda_{\text{ex}} = 380 \text{ nm}$ ,  $d_{\text{ex}} = d_{\text{cm}} = 5 \text{ nm}$ .

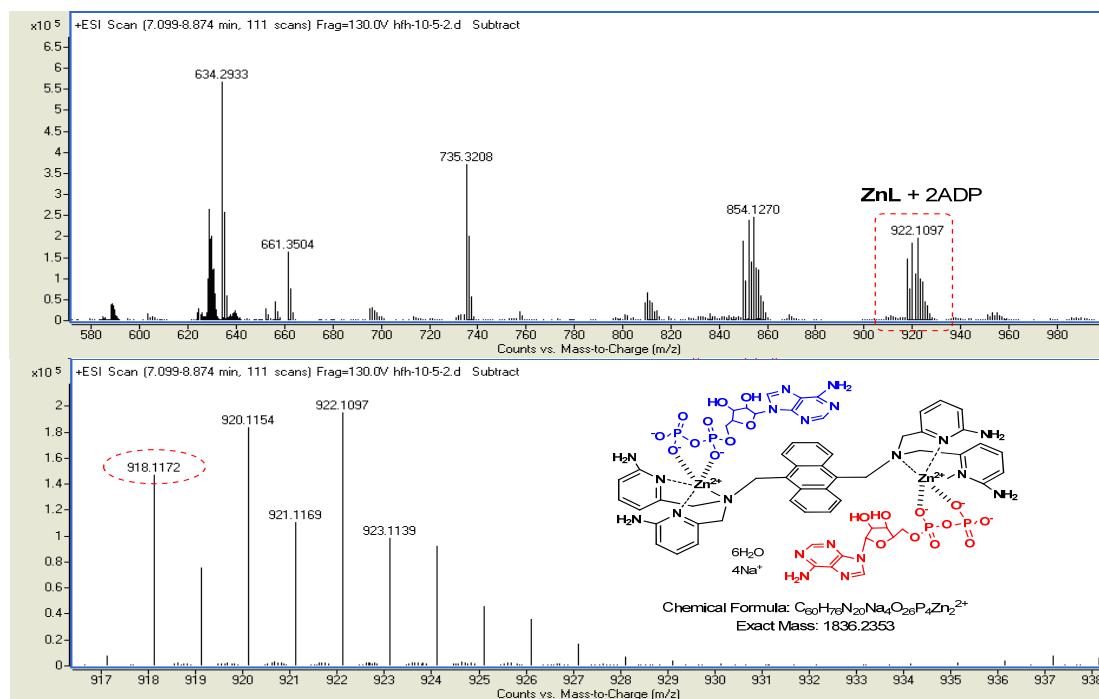

**Figure S18.** High resolution mass spectrum of a mixture of **ZnL** and ADP. The peak at  $m/z = 918.1172$  corresponds to formula  $C_{60}H_{76}N_{20}Na_4O_{26}P_4Zn_2^{2+}$  (calculated mass  $1836.2353 = 2 \times 918.11765$ ), which can be assigned to  $ZnL^{4+} + 2ADP^{3-} + 4Na^+ + 6H_2O$  as shown in the mass spectrum.

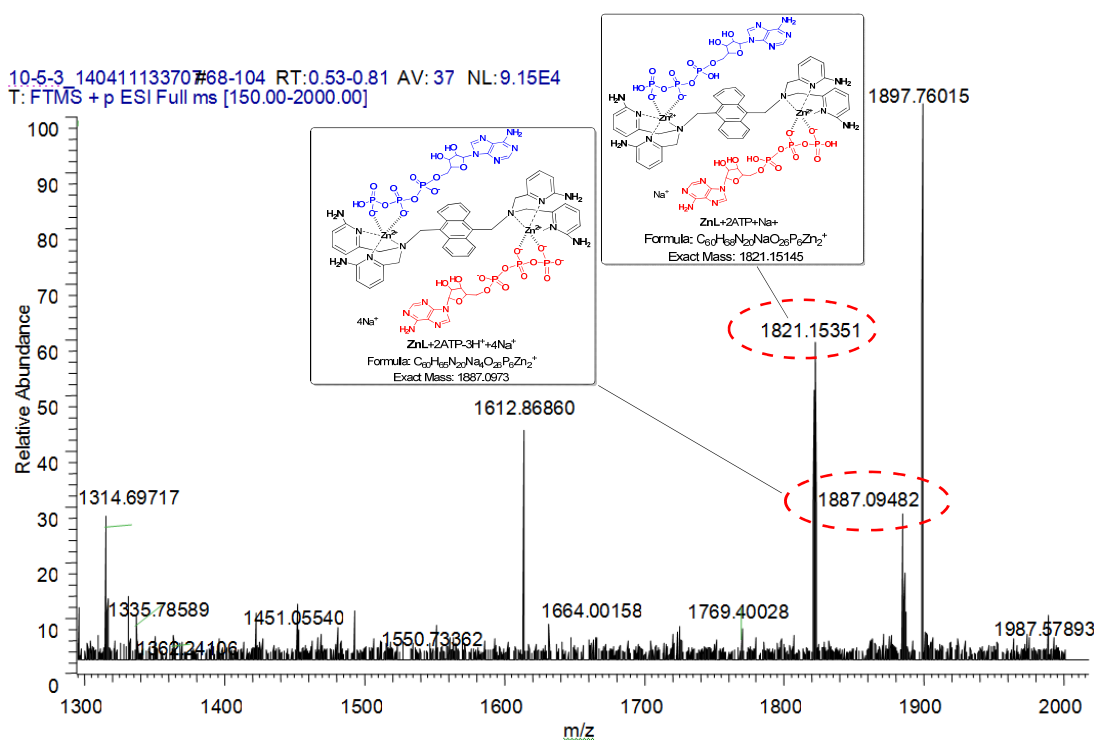

**Figure S19.** High resolution mass spectrum of a mixture of **ZnL** and ATP. The peak at  $m/z = 1821.1535$  corresponds to formula  $C_{60}H_{68}N_{20}NaO_{26}P_6Zn_2^+$  (**ZnL**+2ATP+ $Na^+$ ), which was calculated as 1821.15145. The peak at  $m/z = 1887.09481$  corresponds to formula  $C_{60}H_{65}N_{20}Na_4O_{26}P_6Zn_2^+$  (**ZnL**+2ATP-3 $H^+$ +4 $Na^+$ ), which was calculated as 1887.09728.



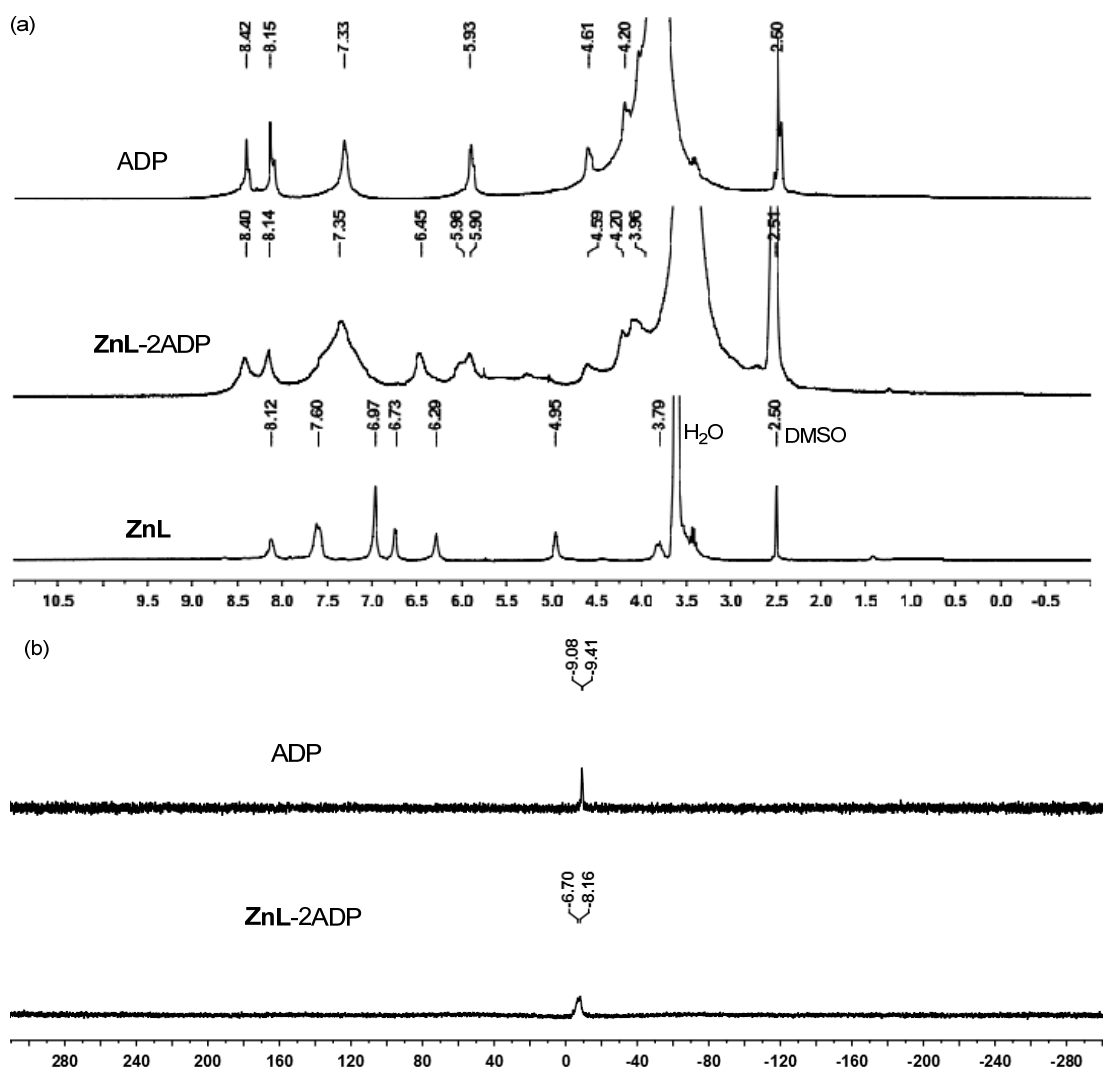

**Figure S20.** (a)  $^1\text{H}$  NMR spectra change and (b)  $^{31}\text{P}$  NMR spectra change of **ZnL** upon addition of ADP in DMSO- $d_6$  at 25 °C. [**ZnL**] = 10 mM, [ADP] = 20 mM. Still, we cannot get very good NMR spectra with high resolution due to the reason of low solubility, but it is clear that **ZnL** binds ADP and a new complex was formed.

#### 4. Quantum Mechanical Calculations

Quantum mechanical calculations based on the density functional theory (DFT) were investigated to identify the configuration of **ZnL-2ADP** and **ZnL-2ATP**. The calculations were performed by Gaussian09 suite. Both of the two structures were optimized at the DFT level with the B3LYP functional. The 6-31G(d) basis set was used for C, H, N, O, and P atoms, while the LANL2DZ basis set was used for Zn atom. The charge values were set to 0 for **ZnL-2ADP** and -2 for **ZnL-2ATP**. The optimized configurations of **ZnL-2ADP** and **ZnL-2ATP** are displayed below. For

**ZnL-2ADP**, the two  $\text{Zn}^{2+}$  ions link **L** and ADP together via five coordination sites, respectively. The  $\text{Zn}^{2+}$  forms coordination bonds with three nitrogen atoms (bond lengths are 2.201Å, 2.171Å, and 2.292Å) of **L** and two oxygen atoms (bond lengths are 2.028Å and 1.999Å) of ADP. Different from the configuration of **ZnL-2ADP**, the  $\text{Zn}^{2+}$  ion in **ZnL-2ATP** join **L** and ATP together via six coordination sites, including three bonds with nitrogen atoms (bond lengths are 2.312Å, 2.304Å, and 2.332Å) of **L** and other three with oxygen atoms (bond lengths are 2.065Å, 2.042Å, and 2.082Å) of ATP. The results suggest that both **ZnL-2ADP** and **ZnL-2ATP** configurations are stable by forming coordination bonds via  $\text{Zn}^{2+}$  ions. Furthermore, the adenine structure in ADP have  $\pi$ - $\pi$  stacking interaction with anthracene of **L** in **ZnL-2ADP**, however, the same interaction does not exist in the configuration of **ZnL-2ATP**.

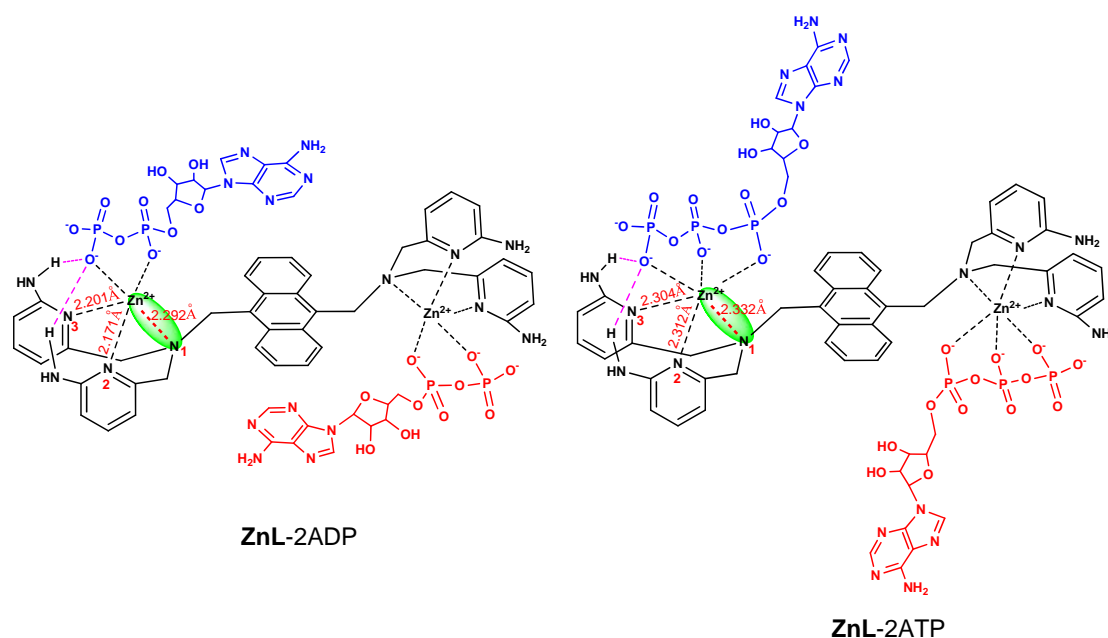

**Figure S21.** DFT calculated bond lengths between  $\text{Zn}^{2+}$  and the coordinated three nitrogen atoms for ADP and ATP, respectively.

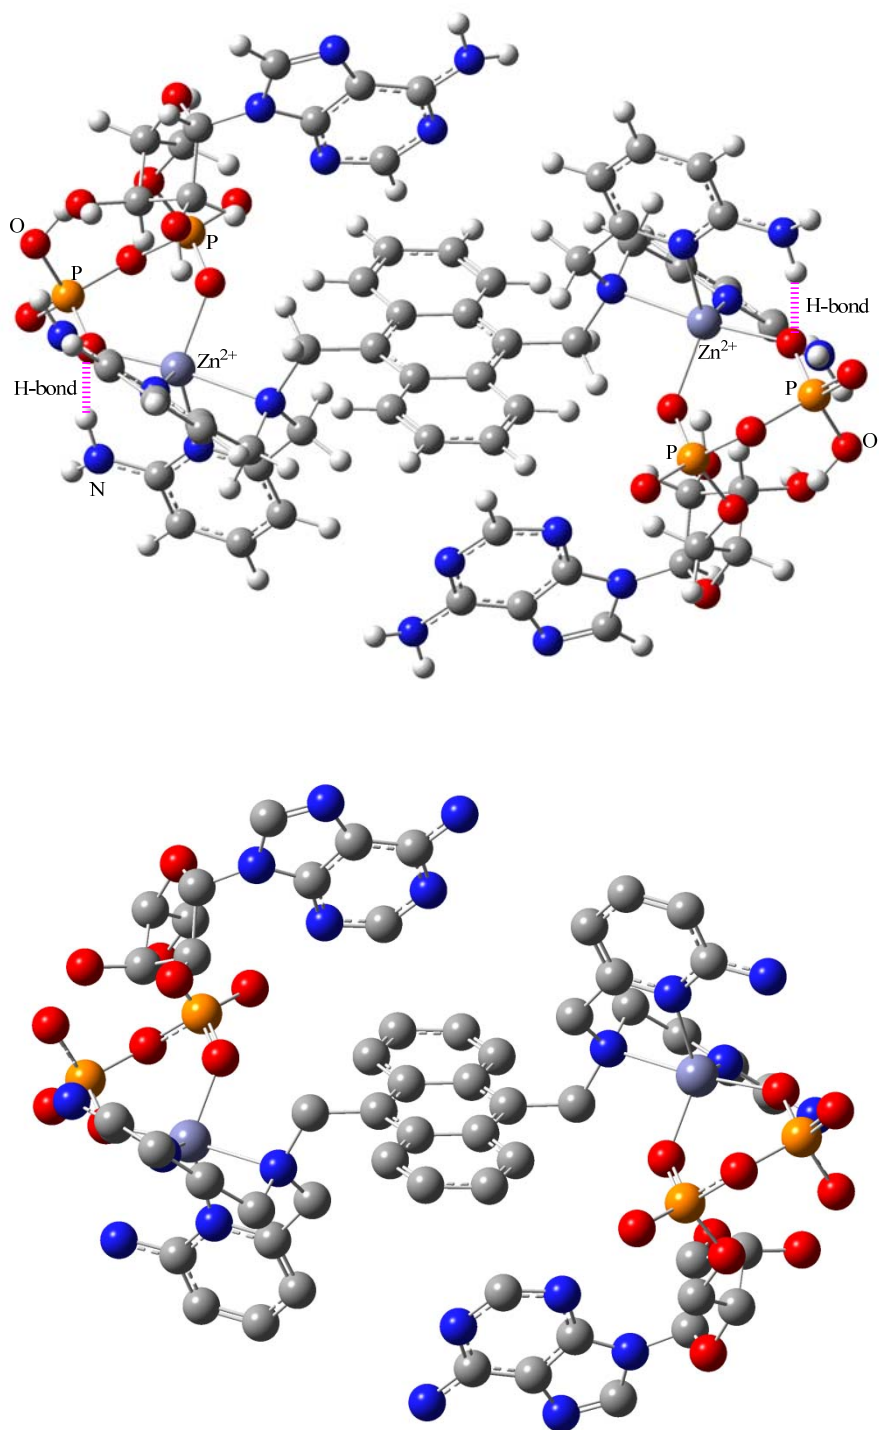

**Figure S22.** DFT calculated interactions between **ZnL** and ADP. Top: View with hydrogen atoms. Bottom: Hydrogen atoms are omitted for clarity.

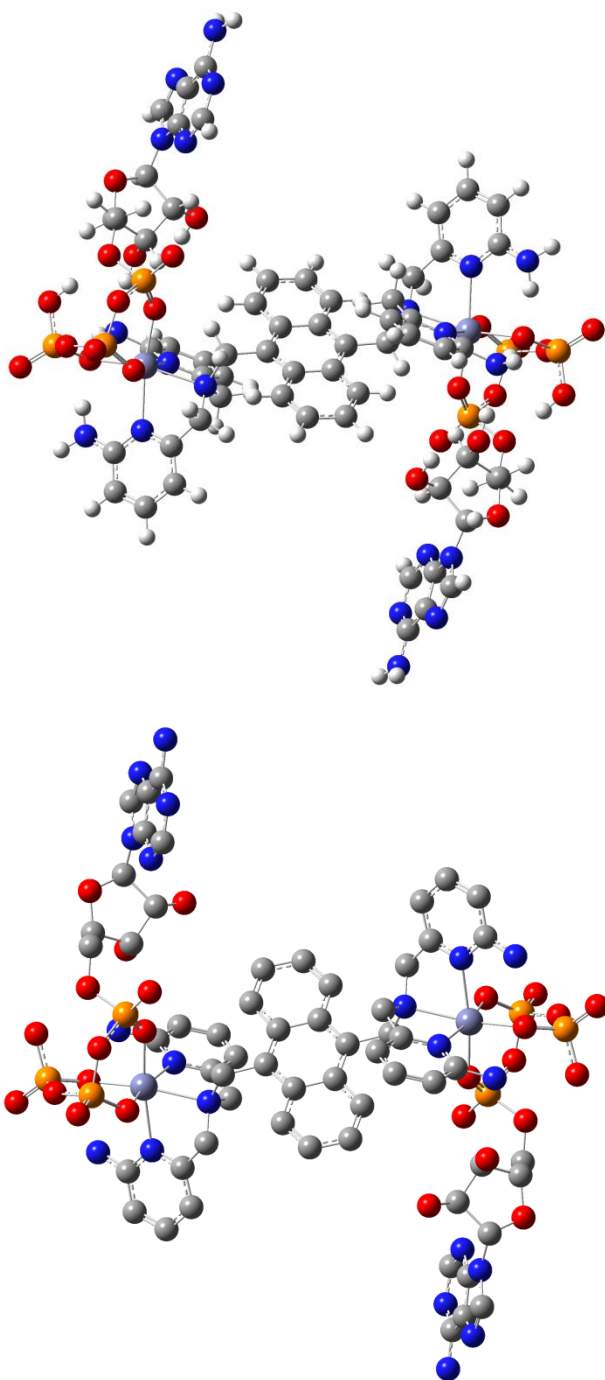

**Figure S23.** DFT calculated interactions between **ZnL** and ATP. Top: View with hydrogen atoms. Bottom: Hydrogen atoms are omitted for clarity.
